# Supplementary material
Source: MDPI journal article supplement (https://www.mdpi.com/2071-1050/12/2/627)
Supplement: s1 [file s1]

Article

# Life Cycle Assessment of Iberian traditional pig production system in Spain

Javier García-Gudiño <sup>1,\*</sup>, Alessandra N.T.R. Monteiro <sup>2</sup>, Sandrine Espagnol <sup>3</sup>, Isabel Blanco-Penedo <sup>4</sup> and Florence Garcia-Launay <sup>2</sup>

<sup>1</sup> Animal Welfare programme, IRTA, Monells 17121, Spain

<sup>2</sup> PEGASE, INRA, Agrocampus Ouest, Saint-Gilles 35590, France; [a\\_monteiro@zootecnista.com.br](mailto:a_monteiro@zootecnista.com.br) (A.N.T.R.M.); [florence.garcia-launay@inra.fr](mailto:florence.garcia-launay@inra.fr) (F.G.-L.)

<sup>3</sup> IFIP, Institut du porc, Le Rheu 35651, France; [sandrine.espagnol@ifip.asso.fr](mailto:sandrine.espagnol@ifip.asso.fr)

<sup>4</sup> Department of Clinical Sciences, SLU, Uppsala SE-750 07, Sweden; [isabel.blanco.penedo@slu.se](mailto:isabel.blanco.penedo@slu.se)

\* Correspondence: [javier.garciag@juntaex.es](mailto:javier.garciag@juntaex.es); Tel.: +34924014025

**File S1.** Questionnaire carried out on participating farms.

Date:

## **BLOCK A: GENERAL DATA**

Name of farm: \_\_\_\_\_

Respondent Name

☐ Owner \_\_\_\_\_

☐ Manager \_\_\_\_\_

☐ Pig farmer \_\_\_\_\_

Farm address:

Coordinate points:

City/town:

Province:

Phone number:

Email:

## **BLOCK B: INVENTORY AND GENERAL MANAGEMENT OF THE FARM**

### **0. USE OF FARM**

Hectares of farm \_\_\_\_\_

Hectares property \_\_\_\_\_

Hectares rented \_\_\_\_\_ (€/ha) \_\_\_\_\_

Hectares dedicated to livestock \_\_\_\_\_

Hectares dedicated for agriculture \_\_\_\_\_

### **1. INVENTORY**

1.1. How many **PIGS** were reared on the farm last year?

I.-Sows \_\_\_\_\_

III.- Gilts \_\_\_\_\_

II.-Boars \_\_\_\_\_

IV.- New boars \_\_\_\_\_

V.-Piglets \_\_\_\_\_

VI.-Rearing pigs \_\_\_\_\_

VII.- Fatteners pigs: Do you buy animals for fattening? \_\_\_\_\_ What type of fattening do you have?

Montanera? \_\_\_\_\_

Outdoors? \_\_\_\_\_

Intensive? \_\_\_\_\_

1.2. Which **BUILDINGS** can be found on the farm?

| Type of building | Area (m <sup>2</sup> ) | Soil type (soil, cement, slat) | Value at beginning (€) | Age (years) | What kind of animals use the installation? |
|------------------|------------------------|--------------------------------|------------------------|-------------|--------------------------------------------|
|                  |                        |                                |                        |             |                                            |
|                  |                        |                                |                        |             |                                            |
|                  |                        |                                |                        |             |                                            |
|                  |                        |                                |                        |             |                                            |
|                  |                        |                                |                        |             |                                            |
|                  |                        |                                |                        |             |                                            |
|                  |                        |                                |                        |             |                                            |
|                  |                        |                                |                        |             |                                            |
|                  |                        |                                |                        |             |                                            |
|                  |                        |                                |                        |             |                                            |
|                  |                        |                                |                        |             |                                            |
|                  |                        |                                |                        |             |                                            |
|                  |                        |                                |                        |             |                                            |
|                  |                        |                                |                        |             |                                            |

Number of campings, if you use them \_\_\_\_\_

**Other aspects of pig installations:**

a) Ventilation: ☐Natural ☐Forced ☐Mix

b) Cold ventilation in gestation: ☐Yes ☐No

c) What type of enrichment material do pigs have?

☐Straw ☐Balls ☐Rope ☐Logs ☐None

**Other aspects of general installations:**

a) Use electricity ☐Public ☐Auto-generator ☐Do not use

b) Use water: ☐Public ☐Own Well ☐River ☐Other \_\_\_\_\_

| Service            | Activity or place of use | Percentage | Activity or place of use | Percentage |
|--------------------|--------------------------|------------|--------------------------|------------|
| <i>Electricity</i> |                          |            |                          |            |
| <i>Water</i>       |                          |            |                          |            |

c) Distance from the road to the home address (km): \_\_\_\_\_

- d) Type of access: ☐ Road in bad conditions  
☐ Road in good conditions  
☐ Asphalt

1.3 What **MACHINES** can be found on the farm?

| Type of machine | Number | Value at beginning (€) | Age (years) |
|-----------------|--------|------------------------|-------------|
|                 |        |                        |             |
|                 |        |                        |             |
|                 |        |                        |             |
|                 |        |                        |             |
|                 |        |                        |             |
|                 |        |                        |             |
|                 |        |                        |             |
|                 |        |                        |             |
|                 |        |                        |             |
|                 |        |                        |             |
|                 |        |                        |             |
|                 |        |                        |             |
|                 |        |                        |             |
|                 |        |                        |             |
|                 |        |                        |             |

**Note:** car, tractor, trailer, seeder, seed drill, fertilizer, harrow, generator, pumps, mill, silo, feed chain, scale, ...

## 2. GENERAL MANAGEMENT ON THE FARM

### 2.1 REPRODUCTIVE MANAGEMENT

2.1.1 What type of mating is done on the farm?

- a) Artificial insemination b) Natural service c) Both

2.1.2 How many mating are performed per year? \_\_\_\_\_ Births? \_\_\_\_\_

2.1.3 Indicate periods that carry out mating

| Mating | January | February | March     | April   | May      | June     |
|--------|---------|----------|-----------|---------|----------|----------|
|        |         |          |           |         |          |          |
|        | July    | August   | September | October | November | December |
|        |         |          |           |         |          |          |

2.1.4 If you use A.I. go to question 2.1.5.

How many pens per mating do you make? \_\_\_\_

How many females per pen? \_\_\_\_

How many males per pen? \_\_\_\_ How long is male with females? \_\_\_\_ days

2.1.5 Breed of boars: ☐ Iberian ☐ Duroc ☐ IberianXDuroc

2.1.6 Do you make ultrasound for gestation diagnosis? ☐ Yes ☐ No

2.1.7 How many sows calve of the total? \_\_\_\_

2.1.8 On average, how many piglets are born per sow? \_\_\_\_ How many piglets are born alive? \_\_\_\_

2.1.9 On average, how many piglets does weaning per female? \_\_\_\_ Weaning age? \_\_\_\_ days. Weight? \_\_\_\_ kg

2.1.10 Age gilt in the first mating \_\_\_\_ months

2.1.11 Average reproductive life sow \_\_\_\_ years

2.1.12 Do you make any strategy for induction oestrus? ☐ Yes ☐ No

If your answer is **YES**, what strategy and how do you do it?

|                          | Indicate (time, kg supplementation/days) |
|--------------------------|------------------------------------------|
| <i>Male effect</i>       |                                          |
| <i>Flushing</i>          |                                          |
| <i>Hormone treatment</i> |                                          |
| <i>Others</i>            |                                          |

Do you supplement sows? ☐ Yes ☐ No

If your answer is **YES**, when and how do you supplement them?

|               | Kg/day | Nº days | €/kg |
|---------------|--------|---------|------|
| Before birth  |        |         |      |
| Post-birth    |        |         |      |
| Until weaning |        |         |      |

Do you provide mineral supplement (salt)? ☐ Yes (specify product and quantity: \_\_\_\_\_)

☐ No

### 2.1.13 Replacement and culling animals

a) Replacement strategy (gilts and new boars) (Rate 1 to 5 (1 is very important and 5 not at all important))

| Selection criteria | Maternal character | Conformation | Prolificacy | Colour | Genetic |
|--------------------|--------------------|--------------|-------------|--------|---------|
| Value              |                    |              |             |        |         |

b) What is the origin of the new breeding animals on the farm? (Mark with **X**). What % of breeding animals are new breeding animals (gilts and new boars) each year?

|                   | Own | Foreign | Average replacement (%) | Cost (€/animal) |
|-------------------|-----|---------|-------------------------|-----------------|
| <b>Gilts/Sows</b> |     |         |                         |                 |
| <b>Boars</b>      |     |         |                         |                 |

c) Culling animal strategy (sows and boars) in the last 12 months (Rate 1 to 5 (1 is very important and 5 not at all important))

| Elimination criteria | Age | Lactation problems | Reproductive problems | Health problems | Other_____ |
|----------------------|-----|--------------------|-----------------------|-----------------|------------|
| Value                |     |                    |                       |                 |            |

## 2.2 FEEDING TABLE

Management table and feeding table

| Stage                  | Stage duration | Weight |       | Food/animal       |  |       |       |       |                     |
|------------------------|----------------|--------|-------|-------------------|--|-------|-------|-------|---------------------|
|                        |                | Start  | Final | Concentrated feed |  | Grass | Acorn | Straw | Other (by-products) |
|                        | Days or months | Kg     |       | Kg/day            |  |       |       |       |                     |
| Dry sows               |                |        |       |                   |  |       |       |       |                     |
| Sows (mating)          |                |        |       |                   |  |       |       |       |                     |
| Sows (pregnant)        |                |        |       |                   |  |       |       |       |                     |
| Farrowing sows         |                |        |       |                   |  |       |       |       |                     |
| Boars without activity |                |        |       |                   |  |       |       |       |                     |
| Boars (mating)         |                |        |       |                   |  |       |       |       |                     |
| Piglets                |                |        |       |                   |  |       |       |       |                     |
| Rearing pigs           |                |        |       |                   |  |       |       |       |                     |
| Growing pigs           |                |        |       |                   |  |       |       |       |                     |
| Fatteners (montanera)  |                |        |       |                   |  |       |       |       |                     |
| Fatteners (outdoors)   |                |        |       |                   |  |       |       |       |                     |
| Fatteners (intensive)  |                |        |       |                   |  |       |       |       |                     |
| Gilts                  |                |        |       |                   |  |       |       |       |                     |
| New boars              |                |        |       |                   |  |       |       |       |                     |

2.2.1 How much concentrate did you buy last year? \_\_\_\_\_ kg total

What is the origin of concentrated feed \_\_\_\_\_

2.2.2 Did you buy another type of food? (straw, silage,...) \_\_\_\_\_

How much? \_\_\_\_\_ Tn or kg \_\_\_\_\_

### 2.2.3 MONTANERA

a) Are your animals fattening in montanera? ☐ Yes ☐ No (If your answer is **NO**, you will go to question **2.2.4**)

b) Type of grazing:

- Rotational (various enclosures) ☐
- A single enclosure ☐
- Guided ☐
- Other ☐

c) Place of grazing:

- Natural pastures ☐  
Cereal crop ☐  
Legume crop ☐  
Other ☐

d) Montanera dates

|      | START | FINAL |
|------|-------|-------|
| Data |       |       |

e) How old are pigs when they enter in montanera? \_\_\_\_\_ months

f) How many Hectares do you use for montanera? \_\_\_\_\_ hectares

g) What is the average density of oaks on the farm? (oaks/hectare) \_\_\_\_\_ ☐ N.A.

h) Acorn production? (kg/oak) \_\_\_\_\_ ☐ N.A.

## 2.2.4 FOOD MANAGEMENT

a) Do animals have access to water 24 hour a day? ☐ Yes ☐ No

b) Do animals have access to food 24 hour a day? ☐ Yes ☐ No

c) If you answer NO, how many times a day the animals have food? \_\_\_\_\_

d) Are diets proposed by professional nutricionist? ☐ Yes ☐ No

e) What is flow of water (litres/minute) of drinkers? \_\_\_\_\_ ☐ N.A:

f) How do you feed pregnant sows?

☐ In group

☐ Individually

☐ Other.....

g) Does food of the pregnant sows change according to their body condition? ☐ Yes ☐ No

h) Do you provide fibber to pregnant sows?

☐ With straw

☐ In diet

☐ N.A:

i) Do you have a system of pre-training for the feeding system (sows)?

☐ No

☐ Yes

## 2.3 OTHER ACTIVITIES IN THE FARM (AGRICULTURE AND LIVESTOCK)

### 2.3.1 Do you do other agricultural activities on the farm?

☐ Yes (continue)

☐ No (you will go to question **2.3.8**)

### 2.3.2 What other activities do you do on the farm?

☐ Cereal crop (wheat, etc). Hectares \_\_\_\_\_ yield (Ton/ha) \_\_\_\_\_

☐ Fodder production. Hectares \_\_\_\_\_ yield (Ton/ha) \_\_\_\_\_ trucks, sheds \_\_\_\_\_

☐ Other crop \_\_\_\_\_ hectares \_\_\_\_\_ yield (Ton/ha) \_\_\_\_\_

☐ Forestry area. Hectares \_\_\_\_\_

☐ Hunting

☐ Recreative (Rural house, guided tours,...)



2.3.3 Do you fertilize the agricultural area? ☐ Yes ☐ No

With what compost do you fertilize and how much per hectare?

☐ Synthetic \_\_\_\_\_

☐ Organic \_\_\_\_\_

☐ Other \_\_\_\_\_

Cost per year (fertilisers) \_\_\_\_\_ €

2.3.4 Use of agricultural product obtained in crops:

Animal consumption in your farm ☐ Yes (species: \_\_\_\_\_) ☐ No

Sale ☐ Yes (whom: \_\_\_\_\_) ☐ No

2.3.5 Transformation of agricultural product ☐ Yes (type product \_\_\_\_\_) ☐ No

2.3.6 Forage conservation: ☐ Hay ☐ Silage

2.3.7 Are grasses shared with other domestic species in rotation cycles? ☐ Yes ☐ No

What species? \_\_\_\_\_ How many hectares are shared? \_\_\_\_\_

2.3.8 Do you do other livestock activities on the farm? ☐ Yes (continue) ☐ No (you will go to question 2.3.10)

2.3.9 What other livestock activities do you do?

☐ **Cattle Inventory:** Cows: \_\_\_\_\_ Bulls: \_\_\_\_\_ Heifers: \_\_\_\_\_  
N. animals sold \_\_\_\_\_ type? \_\_\_\_\_ Average price \_\_\_\_\_ €

☐ **Sheep Inventory:** Ewes: \_\_\_\_\_ Rams: \_\_\_\_\_ Lambs: \_\_\_\_\_  
N. animals sold \_\_\_\_\_ type? \_\_\_\_\_ Average price \_\_\_\_\_ €

☐ **Another species** \_\_\_\_\_ **Inventory:** Females: \_\_\_\_\_ Males: \_\_\_\_\_  
Nº animals sold \_\_\_\_\_ type? \_\_\_\_\_ Average price \_\_\_\_\_ €

2.3.10 What % of income comes from pig production over total income? \_\_\_\_\_%

2.3.11 What % of income comes from each activity? Agricultural \_\_\_\_\_%

Livestock \_\_\_\_\_%

## 2.4 HEALTHY ASPECTS

### 2.4.1 Health treatments

a) Health status: \_\_\_\_\_

b) What diseases are present throughout the year?

- c) Do you vaccinate against which diseases?
- d) Which vaccination program do you have on your farm?
- e) Are you deworming the pigs on your farm? ☐ Yes ☐ No  
If your answer is **YES**, How often and method are you deworming? \_\_\_\_\_
- f) What other treatments do you usually use?
- ☐ vitamin-mineral complexes \_\_\_\_\_
- ☐ antibiotics \_\_\_\_\_
- ☐ analgesics \_\_\_\_\_
- ☐ other \_\_\_\_\_
- g) In the last three months, how many animals have received antibiotic treatment? \_\_\_\_\_
- h) Do you isolate sick animals in any way? ☐ Yes ☐ No
- i) Have staffs trained in selection and administration of veterinary medicines? ☐ Yes ☐ No
- j) Medication costs in the last year: \_\_\_\_\_

#### 2.4.2 On-farm **mortality**

**Deaths in last year**

| Stage                 | Nº dead animals | Main cause of death |
|-----------------------|-----------------|---------------------|
| Sows                  |                 |                     |
| Boars                 |                 |                     |
| Piglets               |                 |                     |
| Rearing pigs          |                 |                     |
| Growing pigs          |                 |                     |
| Fatteners (montanera) |                 |                     |
| Fatteners (outdoors)  |                 |                     |
| Fatteners (intensive) |                 |                     |
| Gilts                 |                 |                     |
| New boars             |                 |                     |

- a) What is the percentage of euthanasia? \_\_\_\_\_%
- b) How is euthanasia practiced in animals?
- ☐ Captive bolt pistol
- ☐ Drugs
- ☐ Other \_\_\_\_\_
- c) How many carcass have been rejected in the last 3 months? \_\_\_\_\_ ☐ NA
- d) Main reasons rejection:
1. \_\_\_\_\_
2. \_\_\_\_\_
3. \_\_\_\_\_

## 2.5 ANIMAL MANAGEMENT

### 2.5.1 Piglets

a) Are piglets mixed in pens after weaning? ☐ Yes ☐ No

If you do not make groups, what do you do with the piglets? \_\_\_\_\_

b) How many piglets do you group?

☐ < 30 piglets ☐ 30-50 piglets ☐ > 50 piglets

c) Do you establish groups of piglets by sex or by weight?

☐ by sex ☐ by weights ☐ not contemplated

d) How long do the piglets stay in these groups?

☐ < 1 month ☐ 1-3 months ☐ > 3 months

e) Are the piglets' tails cut routinely (intensive management)?

☐ No

☐ Yes. *In this case, can you explain why, when and how it is done?*

Why? \_\_\_\_\_

When? \_\_\_\_\_

How? \_\_\_\_\_

f) Are the piglets' teeth cut routinely (intensive management)?

☐ No

☐ Yes. *In this case, can you explain why, when and how it is done?*

Why? \_\_\_\_\_

When? \_\_\_\_\_

How? \_\_\_\_\_

g) Ringed

☐ No

☐ Yes. *In this case, can you explain why, when and how it is done?*

Why? \_\_\_\_\_

When? \_\_\_\_\_

How? \_\_\_\_\_

h) Do you apply any extra good practices to improve animal welfare?

☐ No

☐ Yes, please describe:

\_\_\_\_\_  
\_\_\_\_\_  
\_\_\_\_\_

j) Are staff trained in animal care? ☐ Yes ☐ No

k) What do you use to move animals?

☐ Wood panel   ☐ Electric prod   ☐ Dogs   ☐ Stick   ☐ Other \_\_\_\_\_

l) Castration

| Sex     | Castration age | Method | Who does it? | Time/ animal | Anesthesia | Analgesia | Antibiotic | %Infection | Deaths |
|---------|----------------|--------|--------------|--------------|------------|-----------|------------|------------|--------|
| Males   |                |        |              |              |            |           |            |            |        |
| Females |                |        |              |              |            |           |            |            |        |

m) Are you aware about immunocastration?   ☐ Yes   ☐ No

n) Have you tested immunocastration?   ☐ Yes   ☐ No

o) If you have not tested immunocastration vaccine in your animals, what opinion and reasons do you have?

2.5.2 Housings

| Stage                  | Type       |                |            |                    |               |              |          |                    |          |                   |                         |        | Use days | Surface                  |            |       |
|------------------------|------------|----------------|------------|--------------------|---------------|--------------|----------|--------------------|----------|-------------------|-------------------------|--------|----------|--------------------------|------------|-------|
|                        | Crate/slat | Crate/concrete | Crate/soil | Individual camping | Group camping | Pen concrete | Pen soil | Pen soil /concrete | Pen slat | Pen slat/concrete | Enclosure without trees | Dehesa | Other    | m <sup>2</sup> , ha, etc | Individual | Group |
| Dry sows               |            |                |            |                    |               |              |          |                    |          |                   |                         |        |          |                          |            |       |
| Sows (mating)          |            |                |            |                    |               |              |          |                    |          |                   |                         |        |          |                          |            |       |
| Sows (pregnant)        |            |                |            |                    |               |              |          |                    |          |                   |                         |        |          |                          |            |       |
| Farrowing sows         |            |                |            |                    |               |              |          |                    |          |                   |                         |        |          |                          |            |       |
| Boars without activity |            |                |            |                    |               |              |          |                    |          |                   |                         |        |          |                          |            |       |
| Boars (mating)         |            |                |            |                    |               |              |          |                    |          |                   |                         |        |          |                          |            |       |
| Piglets                |            |                |            |                    |               |              |          |                    |          |                   |                         |        |          |                          |            |       |
| Rearing pigs           |            |                |            |                    |               |              |          |                    |          |                   |                         |        |          |                          |            |       |
| Growing pigs           |            |                |            |                    |               |              |          |                    |          |                   |                         |        |          |                          |            |       |
| Fatteners (montanera)  |            |                |            |                    |               |              |          |                    |          |                   |                         |        |          |                          |            |       |
| Fatteners (outdoors)   |            |                |            |                    |               |              |          |                    |          |                   |                         |        |          |                          |            |       |
| Fatteners (intensive)  |            |                |            |                    |               |              |          |                    |          |                   |                         |        |          |                          |            |       |
| Gilts                  |            |                |            |                    |               |              |          |                    |          |                   |                         |        |          |                          |            |       |
| New boars              |            |                |            |                    |               |              |          |                    |          |                   |                         |        |          |                          |            |       |

Type of installation used in each stage. Indicate quantity, stay time, surface and mark with X if that surface is for an animal or for the group.

## 2.6 WASTE MANAGEMENT

### 2.6.1 Slurry management

| Housings                | Collection      |         |              |      |            | Storage |      |      |         |             |             |           | Distribution |          |        |                             |                 |       |
|-------------------------|-----------------|---------|--------------|------|------------|---------|------|------|---------|-------------|-------------|-----------|--------------|----------|--------|-----------------------------|-----------------|-------|
|                         | Shovel/wheelbar | Tractor | Water hammer | Pipe | How often? | Pit     | Lake | Dung | Compost | Biodigester | Countryside | How long? | Countryside  | Own crop | Dehesa | Foreing crop or countryside | Paid collection | Other |
| Crate/slat              |                 |         |              |      |            |         |      |      |         |             |             |           |              |          |        |                             |                 |       |
| Crate/concrete          |                 |         |              |      |            |         |      |      |         |             |             |           |              |          |        |                             |                 |       |
| Crate/soil              |                 |         |              |      |            |         |      |      |         |             |             |           |              |          |        |                             |                 |       |
| Individual camping      |                 |         |              |      |            |         |      |      |         |             |             |           |              |          |        |                             |                 |       |
| Group camping           |                 |         |              |      |            |         |      |      |         |             |             |           |              |          |        |                             |                 |       |
| Pen (concrete)          |                 |         |              |      |            |         |      |      |         |             |             |           |              |          |        |                             |                 |       |
| Pen (soil)              |                 |         |              |      |            |         |      |      |         |             |             |           |              |          |        |                             |                 |       |
| Pen (concrete/soil)     |                 |         |              |      |            |         |      |      |         |             |             |           |              |          |        |                             |                 |       |
| Pen (slat)              |                 |         |              |      |            |         |      |      |         |             |             |           |              |          |        |                             |                 |       |
| Pen (concrete/slat)     |                 |         |              |      |            |         |      |      |         |             |             |           |              |          |        |                             |                 |       |
| Enclosure without trees |                 |         |              |      |            |         |      |      |         |             |             |           |              |          |        |                             |                 |       |
| Dehesa                  |                 |         |              |      |            |         |      |      |         |             |             |           |              |          |        |                             |                 |       |
| Other                   |                 |         |              |      |            |         |      |      |         |             |             |           |              |          |        |                             |                 |       |

Mark with X the method used and indicate time of permanence of slurry in that installation

2.6.2 Do you provide some kind of bed to animals? Yes ☐ (Continue) No ☐ (go to question 2.7)

2.6.3 What material?

- ☐ Sawdust. How much? \_\_\_\_\_
- ☐ Soil. How much? \_\_\_\_\_
- ☐ Straw. How much? \_\_\_\_\_
- ☐ Other \_\_\_\_\_ How much? \_\_\_\_\_

2.6.4 How often do you remove the bedding? \_\_\_\_\_

## 2.7 BIOSECURITY

- a) Is there enclosure perimeter on your farm? ☐ Yes ☐ No
- b) Is there “sanitary moat” in entrance of farm? ☐ Yes ☐ No
- c) Are special clothes and shoes used to enter in farm installations? ☐ Yes ☐ No
- d) Are the people who visit the farm registered? ☐ Yes ☐ No
- e) Do farm animals have contact with wild animals? ☐ Yes ☐ No

- f) What wild species can be found in this area?
- ☐ Wild boars ☐ Birds
- ☐ Stags ☐ Rabbits or hares
- ☐ Foxes ☐ Rodents
- g) Are there pets on the farm?
- ☐ Dogs ☐ Cats ☐ Dogs and cats ☐ None
- h) How far is another pig farm? \_\_\_\_\_ km
- i) How are dead animals eliminated?
- ☐ Collection service (one day) ☐ Collection service (accumulation)
- ☐ For vultures (*muladar*) ☐ Incineration
- ☐ For pets ☐ Burial
- ☐ Other \_\_\_\_\_
- j) Do you regularly wash and disinfect installations? ☐ Yes ☐ No
- k) With which product do you wash or disinfect? \_\_\_\_\_
- l) Where is foreign livestock received?
- ☐ In different pens (observation or quarantine)
- ☐ No separation of farm's livestock
- m) The groups of animals are mixed:
- ☐ At weaning or entrance
- ☐ After this period

## **BLOCK C: FARM STRUCTURE**

### **3. SOCIAL ASPECTS and LABOUR**

#### **3.1 PERSONAL ISSUES**

- a) About owner of the farm:

| Age | Nº sons | Nº people who depend on the farm | Nº year in activity |
|-----|---------|----------------------------------|---------------------|
|     |         |                                  |                     |

| MARITAL STATUS |                          | EDUCATION   |                          |
|----------------|--------------------------|-------------|--------------------------|
| Married        | <input type="checkbox"/> | School      | <input type="checkbox"/> |
| Widow          | <input type="checkbox"/> | High school | <input type="checkbox"/> |
| Single         | <input type="checkbox"/> | University  | <input type="checkbox"/> |
| Divorced       | <input type="checkbox"/> | No study    | <input type="checkbox"/> |

b) Why are you a farmer? (You can select multiple options)

- ☐ Heredity
- ☐ Family tradition
- ☐ Hobby (pigs)
- ☐ I had no other choice
- ☐ I believed that it's a good business
- ☐ Other \_\_\_\_\_

c) If you were not pig farmer, where would you work? (You can select multiple options)

- ☐ I would have my business
- ☐ I would have other job in **livestock or agriculture**
- ☐ I would work in **health sector**
- ☐ I would work in **public sector**
- ☐ I would work in **private sector** (company)
- ☐ Other \_\_\_\_\_

d) What are your personal interests as farm owner? (You can select multiple options)

- ☐ Personal and family support
- ☐ I want to increase revenue
- ☐ I want to buy something (house, car ...)
- ☐ I want to educate my children in countryside
- ☐ I want to retire and travel around the world
- ☐ I want to keep tradition familiar
- ☐ Other \_\_\_\_\_

e) What are your objectives in pig production? (You can select multiple options)

- ☐ I want to export my products
- ☐ I want to be the best of my region
- ☐ I want to be the best of Spain/Portugal
- ☐ I want to keep tradition
- ☐ I want to grow the business
- ☐ Other \_\_\_\_\_

f) Do you want to continue in pig production?

- ☐ No
- ☐ Yes, but less than 5 years
- ☐ Yes, more than 5 years

g) In the future, when you become retired:

Do you think your children will continue with pork production? ☐ Yes ☐ No

Will you sell the animals to family member? ☐ Yes ☐ No

Other: \_\_\_\_\_

h) Is livestock farming your main activity? ☐ Yes ☐ No. Indicate which (sector \_\_\_\_\_)

i) Main problems:

| Importance level                   | Little |   |   |   |   | Much |   |   |   |   |
|------------------------------------|--------|---|---|---|---|------|---|---|---|---|
|                                    | 1      | 2 | 3 | 4 | 5 | 1    | 2 | 3 | 4 | 5 |
| 1. Price of meat                   |        |   |   |   |   |      |   |   |   |   |
| 2. High price of concentrated feed |        |   |   |   |   |      |   |   |   |   |
| 3. Decrease subsidies              |        |   |   |   |   |      |   |   |   |   |
| 4. Administration                  |        |   |   |   |   |      |   |   |   |   |
| 5. Small surface (montanera)       |        |   |   |   |   |      |   |   |   |   |
| 6. Successors of the farm          |        |   |   |   |   |      |   |   |   |   |
| 7. Environmental problems          |        |   |   |   |   |      |   |   |   |   |
| 8. Meat purchases                  |        |   |   |   |   |      |   |   |   |   |
| 9. Health requirements             |        |   |   |   |   |      |   |   |   |   |
| 10. Veterinary control             |        |   |   |   |   |      |   |   |   |   |
| 11. Other _____                    |        |   |   |   |   |      |   |   |   |   |

### 3.2 STRUCTURAL DATA

a) When was your farm built? (year)

b) What pig production is done on your farm?

- ☐ Production
- ☐ Selection
- ☐ Gilts and boars to sell
- ☐ Transition of piglets
- ☐ Production of piglets
- ☐ Production of rearing
- ☐ Production of growers
- ☐ Fatteners (☐Montanera ☐Outdoors ☐Intensive)
- ☐ Complete cycle (rearing, growing and finishing pigs)
- ☐ Mixed (piglets and fatteners)

c) What is the productive capacity in your farm?

- ☐ Group 1: until 120 LU
- ☐ Group 2: between 121 LU and up to 360 LU
- ☐ Group 3: between 361 LU and up to 864 LU
- ☐ NA

d) When was the farm adapted to animal welfare regulations? ☐NA

 /  / 

e) Did the farm have to make any changes to this regulation?

☐No

☐Yes (in this case, you choose one option)

- ☐ Complete cycle by piglets production
- ☐ Reduction number of sows
- ☐ Increase number of sows
- ☐ Other. Specify:



### 3.3 LABOUR

a) How do you select workers for your farm?

- ☐ I value experience and knowledge  
☐ I selected by recommendation from sector colleagues  
☐ I contract family members or friends  
☐ Other \_\_\_\_\_

b) Labour data (how many workers do you have contracted?)

| Sex | Age | Years | Relationship | Education | Nationality | Salary | Timetable | Holidays |
|-----|-----|-------|--------------|-----------|-------------|--------|-----------|----------|
|     |     |       |              |           |             |        |           |          |
|     |     |       |              |           |             |        |           |          |
|     |     |       |              |           |             |        |           |          |
|     |     |       |              |           |             |        |           |          |
|     |     |       |              |           |             |        |           |          |
|     |     |       |              |           |             |        |           |          |
|     |     |       |              |           |             |        |           |          |

Nº temporary workers \_\_\_\_\_ N.day's wage/year \_\_\_\_\_

c) How do you know that workers work well?

- ☐ The manager values them  
☐ I set goals  
☐ I value final production  
☐ I don't make any assessment  
☐ Other \_\_\_\_\_

d) Do you recognize or reward the work of employees? ☐ Yes ☐ No

e) How?

- ☐ Money  
☐ Gift  
☐ Symbolic  
☐ Verbally  
☐ I don't reward them  
☐ Other \_\_\_\_\_

f) What training do your employees perform?

| Personal | Type<br>(course, online, conferences...) | Frequency | Topic<br>(Health, production, welfare animal o labour risk) |
|----------|------------------------------------------|-----------|-------------------------------------------------------------|
|          |                                          |           |                                                             |
|          |                                          |           |                                                             |
|          |                                          |           |                                                             |
|          |                                          |           |                                                             |
|          |                                          |           |                                                             |

g) What percentage of the work your employees dedicate to pork activity? \_\_\_\_\_%

#### 4. FARM MANAGEMENT

a) Association level

- ☐ AEERIBER  
☐ BREED (indicate: \_\_\_\_\_)  
☐ ADS  
☐ FARMERS ORGANIZATION/UPA (indicate: \_\_\_\_\_)  
☐ COOPERATIVES  
☐ Others(indicate:\_\_\_\_\_)

b) Are you frequently registering information of farm? ☐ Yes ☐ No

c) What information is recorded? *(You can select multiple options)*

- ☐ Accountant and financier  
☐ Movements of animals (entries and outputs)  
☐ Inseminations and mating  
☐ Data births and litters  
☐ Deaths (causes)  
☐ Weights  
☐ Weight daily gain  
☐ Feed consumption  
☐ Data vaccination  
☐ Data deworming  
☐ Diseases and treatments

d) Why do you register this data? *(You can select multiple options)*

- ☐ History  
☐ Reference  
☐ Evaluate changes on farm  
☐ Evaluate work of employers  
☐ Requirement (veterinarian or association)  
☐ Farm control  
☐ Others reasons\_\_\_\_\_

e) Advice company:

| Adviser                      | Type (reproductive/technical/<br>accountant/other) | Visit/year | Conditions |
|------------------------------|----------------------------------------------------|------------|------------|
| Veterinarian                 |                                                    |            |            |
| Other professional:<br>_____ |                                                    |            |            |
| Other expert:<br>_____       |                                                    |            |            |

f) What information sources do you regularly consult? *(You can select multiple options)*

- ☐ Newsletters  
☐ Magazines  
☐ Brochures  
☐ Technical advice  
☐ Livestock meetings  
☐ Technical meetings  
☐ Internet  
☐ Recommendations (family or friends)  
☐ Other\_\_\_\_\_

g) Why do you use this information? (*You can select multiple options*)

- ☐ Information and treatment about diseases
- ☐ Innovation in pig production
- ☐ To compare with my farm management (benchmarking)
- ☐ To modify my farm management following a reference
- ☐ Save money
- ☐ I don't hire technical services
- ☐ Met regulations
- ☐ Other: \_\_\_\_\_

h) What improvement plans does the farm have at present?

- ☐ Genetic improvement
- ☐ Transition to organic livestock
- ☐ Staff training
- ☐ Installations improvement
- ☐ Dietary change
- ☐ Expansion farm
- ☐ Transition to intensive livestock
- ☐ None

## 5. ECONOMIC ASPECTS AND COMMERCIALIZATION

### 5.1 COMMERCIALIZATION, SALES AND INCOME

Sales of animals

| Type of animal                  | Number | Average weight | Average age | Price/animal | Form of sale* |
|---------------------------------|--------|----------------|-------------|--------------|---------------|
| Piglets                         |        |                |             |              |               |
| Rearing pigs ( <i>marrano</i> ) |        |                |             |              |               |
| Growing pigs ( <i>primal</i> )  |        |                |             |              |               |
| Fatteners in montanera          |        |                |             |              |               |
| Fatteners in outdoors           |        |                |             |              |               |
| Fatteners in intensive          |        |                |             |              |               |
| Culling animals                 |        |                |             |              |               |
| Gilts                           |        |                |             |              |               |
| Boars                           |        |                |             |              |               |
| Other (_____)                   |        |                |             |              |               |

\*Industrial, supermarket, butcher, cooperative, direct sale, other

a) Do your animals' products belong to some PDO? ☐ Yes, which? \_\_\_\_\_ ☐ No

b) Do your animals' products meet national regulation (Norma del Ibérico)? ☐ Yes ☐ No

#### Slaughter

| Process    | Slaughterhouse<br>(own, municipal or private) | Distance (Km) | € / animal |
|------------|-----------------------------------------------|---------------|------------|
| Slaughter  |                                               |               |            |
| Quartering |                                               |               |            |
| Dryer      |                                               |               |            |

#### Sale of agricultural products

|                     | €/year | Kg | €/kg |
|---------------------|--------|----|------|
| Cereals             |        |    |      |
| Legumes             |        |    |      |
| Straw or Hay        |        |    |      |
| Harvest by-products |        |    |      |
| Other               |        |    |      |

#### Sales of animal by-products

|        | €/year | kg | €/kg |
|--------|--------|----|------|
| Manure |        |    |      |
| Slurry |        |    |      |
| Other  |        |    |      |

#### Subsidies

|                            | €/year | Nº animals | €/animal |
|----------------------------|--------|------------|----------|
| CAP                        |        |            |          |
| Native breed               |        |            |          |
| Extensification (pastures) |        |            |          |
| Organic livestock          |        |            |          |
| Dead animals collecting    |        |            |          |
| Other                      |        |            |          |

## 5.2 COSTS

#### Purchase of animals

| Type of animal                            | Number | Price | Origin | Distance | Travel time | Means of transport | Deaths |
|-------------------------------------------|--------|-------|--------|----------|-------------|--------------------|--------|
| Gilt / sow                                |        |       |        |          |             |                    |        |
| Boar                                      |        |       |        |          |             |                    |        |
| Piglets                                   |        |       |        |          |             |                    |        |
| Rearing/growing pigs<br>(marrano, primal) |        |       |        |          |             |                    |        |
| Other (_____)                             |        |       |        |          |             |                    |        |

**Animal supplement and feedstock for agriculture**

| Feed or feedstock* | Origin |          |        | Quantity (kg) | Price (€/kg) |
|--------------------|--------|----------|--------|---------------|--------------|
|                    | Own    | Purchase | Where? |               |              |
|                    |        |          |        |               |              |
|                    |        |          |        |               |              |
|                    |        |          |        |               |              |
|                    |        |          |        |               |              |
|                    |        |          |        |               |              |
|                    |        |          |        |               |              |
|                    |        |          |        |               |              |
|                    |        |          |        |               |              |
|                    |        |          |        |               |              |

\*Concentrated feed, by-products, cereal, seeds, straw, hay, other

| External services | €/ year | €/ animal |
|-------------------|---------|-----------|
| Administration    |         |           |
| Veterinarian      |         |           |
| Tax adviser       |         |           |
| Insurances        |         |           |
| Norma Inspector   |         |           |
| P. D. O.          |         |           |
| AECERIBER         |         |           |
| Slurry collecting |         |           |
| Other             |         |           |

| Supplies    | €/month |
|-------------|---------|
| Fuels       |         |
| Electricity |         |
| Water       |         |
| Phone       |         |
| Medicines   |         |
| Other       |         |

Reparations and conservation (€/year) \_\_\_\_\_

Land rent (€/year) \_\_\_\_\_

Installations rent (€/year) \_\_\_\_\_

Machines rent (€/year) \_\_\_\_\_

### Financial expenses

| FINANCIAL PRODUCT       | Loan | Coverage | Mortgage |
|-------------------------|------|----------|----------|
| Indebtedness total(€)   |      |          |          |
| Interest rate (%)       |      |          |          |
| Annual payment (€/year) |      |          |          |

| Taxes      | €/year |
|------------|--------|
| IBI        |        |
| IRPF o ISS |        |

### BLOCK D: OBSERVATONS

**Table S1.** Chemical composition of feed formulas and natural resources and feed ingredients incorporated of each feed formulas.

| Chemical composition<br>(g/kg) | <i>Sow</i>             |                        | <i>Piglets-weaners</i> |                         | <i>Growers</i>    |                   | <i>Fatteners cebo campo</i> |                    |                        |                          | <i>Natural resources <sup>c</sup></i> |       |
|--------------------------------|------------------------|------------------------|------------------------|-------------------------|-------------------|-------------------|-----------------------------|--------------------|------------------------|--------------------------|---------------------------------------|-------|
|                                | Gestating <sup>a</sup> | Lactating <sup>a</sup> | Starter <sup>a</sup>   | Transition <sup>a</sup> | Gr 1 <sup>a</sup> | Gr 2 <sup>b</sup> | Fat 1 <sup>a</sup>          | Fat 2 <sup>b</sup> | Final Fat <sup>a</sup> | Quality Fat <sup>b</sup> | Acorn                                 | Grass |
| CP                             | 140.4                  | 173.2                  | 157.5                  | 166.3                   | 154.9             | 161.4             | 115.3                       | 157.4              | 107.9                  | 150.9                    | 58.80                                 | 222.0 |
| OM                             | 849.5                  | 851.4                  | 859.3                  | 852.8                   | 849.6             | 849.0             | 854.9                       | 851.4              | 855.2                  | 853.3                    | 978.0                                 | 852.0 |
| OMd                            | 661.9                  | 645.6                  | 654.6                  | 657.4                   | 651.1             | 636.6             | 653.8                       | 596.93             | 643.08                 | 601.78                   | 856.7                                 | 746.4 |
| ResD                           | 85.64                  | 83.52                  | 73.80                  | 80.06                   | 81.99             | 84.74             | 74.69                       | 76.38              | 72.86                  | 75.42                    | 28.26                                 | 550.8 |
| P                              | 3.46                   | 3.54                   | 4.84                   | 3.44                    | 3.47              | 4.66              | 3.11                        | 3.80               | 3.00                   | 4.29                     | 0.80                                  | 1.42  |
| Ingredients<br>(kg/Tn)         | <i>Sow</i>             |                        | <i>Piglets-weaners</i> |                         | <i>Growers</i>    |                   | <i>Fatteners cebo campo</i> |                    |                        |                          |                                       |       |
|                                | Gestating <sup>a</sup> | Lactating <sup>a</sup> | Starter <sup>a</sup>   | Transition <sup>a</sup> | Gr 1 <sup>a</sup> | Gr 2 <sup>b</sup> | Fat 1 <sup>a</sup>          | Fat 2 <sup>b</sup> | Final Fat <sup>a</sup> | Quality Fat <sup>b</sup> |                                       |       |
| Soybean meal Brazil            | 94.24                  | 179.2                  | 163.8                  | 159.6                   | 128.9             | 117.0             | 31.70                       | 53.00              |                        | 26.00                    |                                       |       |
| Spring pea Spain               |                        |                        |                        |                         |                   | 60.00             |                             | 125.00             |                        | 150.0                    |                                       |       |
| Sunflower oil Spain            |                        |                        |                        |                         |                   |                   |                             |                    |                        | 57.00                    |                                       |       |
| Wheat Spain                    | 194.4                  | 300.0                  | 200.0                  | 250.0                   | 250.0             | 300.0             | 237.1                       | 549.6              | 308.6                  | 449.6                    |                                       |       |
| Maize Spain                    | 47.33                  | 121.6                  | 300.0                  | 200.0                   | 129.0             |                   | 170.2                       | 100.0              | 168.5                  | 100.0                    |                                       |       |
| Barley Spain                   | 620.0                  | 337.1                  | 246.5                  | 332.4                   | 450.0             | 473.5             | 500.0                       | 120.0              | 459.6                  | 195.0                    |                                       |       |
| Lard                           | 12.93                  | 30.28                  | 29.80                  | 21.33                   | 10.00             | 28.00             | 21.00                       | 32.00              | 23.34                  |                          |                                       |       |
| Salt                           |                        |                        | 4.50                   |                         |                   | 4.00              |                             | 4.00               |                        | 4.00                     |                                       |       |
| Bicalcium phosphate            |                        |                        | 8.44                   |                         |                   | 6.00              |                             | 3.00               |                        | 3.00                     |                                       |       |
| Calcium carbonate              |                        |                        | 2.78                   |                         |                   | 7.00              |                             | 8.50               |                        | 11.00                    |                                       |       |
| L-lysine                       | 1.08                   | 1.65                   | 2.65                   | 4.33                    | 1.83              | 1.50              |                             | 1.90               |                        | 1.40                     |                                       |       |
| L-threonine                    |                        | 0.17                   | 0.67                   | 1.65                    | 0.29              |                   |                             |                    |                        |                          |                                       |       |
| L-valine                       |                        |                        | 0.53                   |                         |                   |                   |                             |                    |                        |                          |                                       |       |
| L-methionine                   |                        |                        | 0.37                   | 0.66                    |                   |                   |                             |                    |                        |                          |                                       |       |
| Premix                         | 30.00                  | 30.00                  | 40.00                  | 30.00                   | 30.00             | 3.00              | 40.00                       | 3.00               | 40.00                  | 3.00                     |                                       |       |

Crude protein (CP). Organic matter (OM). Digestibility organic matter (OMd). Digested fibre content (ResD). Growing feed (Gr). Fattening feed (Fat).

<sup>a</sup> Compound feed produced by Company 1.

<sup>b</sup> Compound feed produced by Company 2.

<sup>c</sup> FEDNA [36]; García-Valverde et al. [34,40]; Rodríguez-Estévez et al. [32]; Vázquez et al. [35].

**Table S2.** Data Iberian pig farms.

|                                 | <b>Mean</b> | <b>Standard deviation</b> | <b>Minimum value</b> | <b>Maximum value</b> |
|---------------------------------|-------------|---------------------------|----------------------|----------------------|
| <i>Surface</i>                  |             |                           |                      |                      |
| Farm, ha                        | 670.3       | 636.2                     | 28.5                 | 3000                 |
| Dehesa, ha                      | 528.9       | 437.8                     | 18                   | 2000                 |
| <i>Number of sows/farm</i>      | 34.41       | 25.23                     | 10                   | 100                  |
| <i>Number of boars/farm</i>     | 4.00        | 3.79                      | 1                    | 14                   |
| <i>Number of fatteners/farm</i> |             |                           |                      |                      |
| Montanera                       | 213.8       | 141.3                     | 25                   | 700                  |
| Cebo campo                      | 213.3       | 256.2                     | 35                   | 700                  |
| <i>Sows</i>                     |             |                           |                      |                      |
| Total born/ farrowing, number   | 8.33        | 0.89                      | 7                    | 10                   |
| Born alive/ farrowing, number   | 7.55        | 0.60                      | 6.5                  | 8                    |
| Weaned/ farrowing, number       | 6.17        | 0.74                      | 4.5                  | 8                    |
| Weaning weight, kg              | 11.58       | 4.40                      | 5.2                  | 23                   |
| Weaning age, days               | 45.32       | 12.91                     | 25                   | 90                   |
| <i>Fatteners</i>                |             |                           |                      |                      |
| Slaughter LW, kg                | 178.7       | 11.23                     | 160                  | 200                  |
| Age at slaughter, months        | 18.63       | 2.05                      | 14                   | 22.5                 |

*Number of farms (n=33). Number farms montanera (n=27). Number farms montanera and cebo campo (n=6).*
